# Supplementary material
Source: PubMed Central journal article supplement (PMC3634681)
Supplement: supp_tpc.112.109074_tpc109074Supplemental.pdf [file supp_tpc.112.109074_tpc109074Supplemental.pdf]

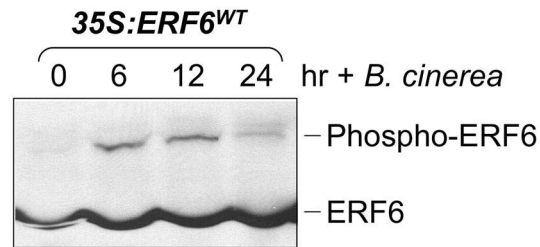

**Supplemental Figure 1.** Phos-Tag mobility shift detection of in vivo phosphorylated ERF6 in *35S:ERF6<sup>WT</sup>* plants after *B. cinerea* inoculation.

Protein extracts from *35S:ERF6<sup>WT</sup>* seedlings treated with *B. cinerea* for different times were separated in an SDS-PAGE gel with Phos-tag reagent. The samples are the same as the ones shown in Figure 2 (the first panel). After being transferred to a nitrocellulose membrane, myc-tagged ERF6<sup>WT</sup> protein was detected by an anti-myc antibody.

|               |     |                    |     |
|---------------|-----|--------------------|-----|
| <b>ACS6</b>   | 474 | -SPHSPVPPSPLVRAQT  | 495 |
| <b>ERF6</b>   | 266 | -SPLSPHPPFGYPQLTVV | 282 |
| <b>ERF5</b>   | 284 | -SPLSPHPPFGYSQLTVV | 300 |
| <b>ERF104</b> | 229 | -SPTSPNFSVISVT     | 241 |
| <b>ERF105</b> | 208 | -SPCPSLGHSQLVVT    | 221 |

++ ++

**Supplemental Figure 2.** Alignment of the C-termini of ERF6, ERF5, ERF104, and ERF105 with the C-terminus of ACS6 that contains the MPK3/MPK6-phosphorylation sites. Plus symbols indicate the conserved MAPK-phosphorylation sites.

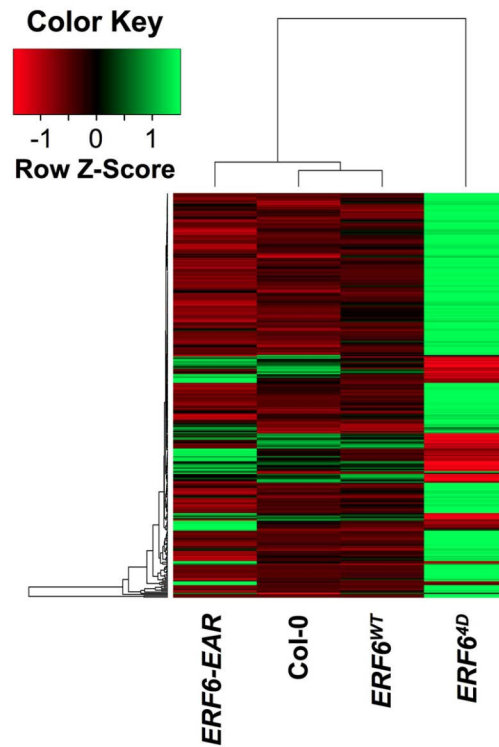

**Supplemental Figure 3.** Differential gene expression in twelve-day-old *Col-0*, *35S:ERF6<sup>WT</sup>*, *35S:ERF6<sup>4D</sup>*, and *35S:ERF6-EAR* seedlings.

Differential gene expression patterns of *Col-0*, *35S:ERF6<sup>WT</sup>*, *35S:ERF6<sup>4D</sup>*, and *35S:ERF6-EAR* seedlings based on Illumina RNA-Seq data. The heat map includes all genes that were differentially expressed in *ERF6<sup>4D</sup>* seedlings (320 genes, p-value  $\leq 0.001$ ). The color key represents Z-Score transformed RPKM values of 320 specific genes. Green indicates an increase in expression, red indicates a decrease in expression; color intensity indicates the magnitude of the effect.

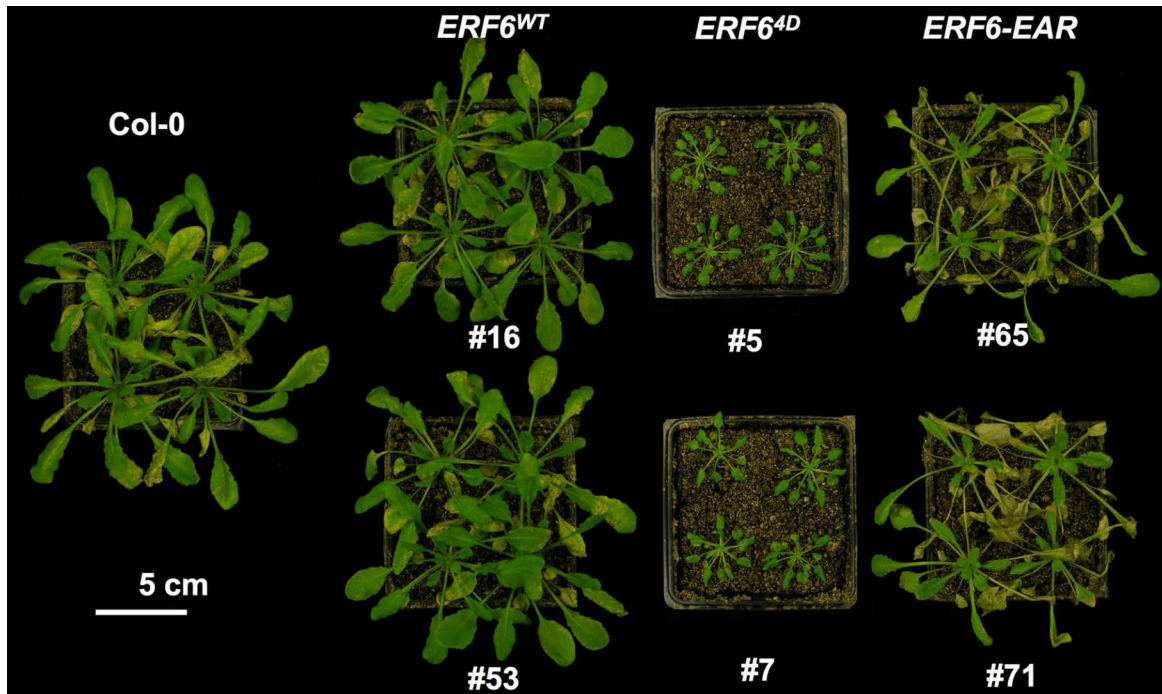

**Supplemental Figure 4.** Expression of phospho-mimicking *ERF6*<sup>4D</sup> confers strong resistance to *B. cinerea*; whereas expression of a dominant negative *ERF6-EAR* results in an opposite phenotype.

Four-week-old soil grown Col-0, 35S:*ERF6*<sup>WT</sup>, 35S:*ERF6*<sup>4D</sup>, and 35S:*ERF6-EAR* plants were spray-inoculated with *B. cinerea* spore suspension ( $1 \times 10^5$  spores/ml). Images were taken at 3 days after inoculation.

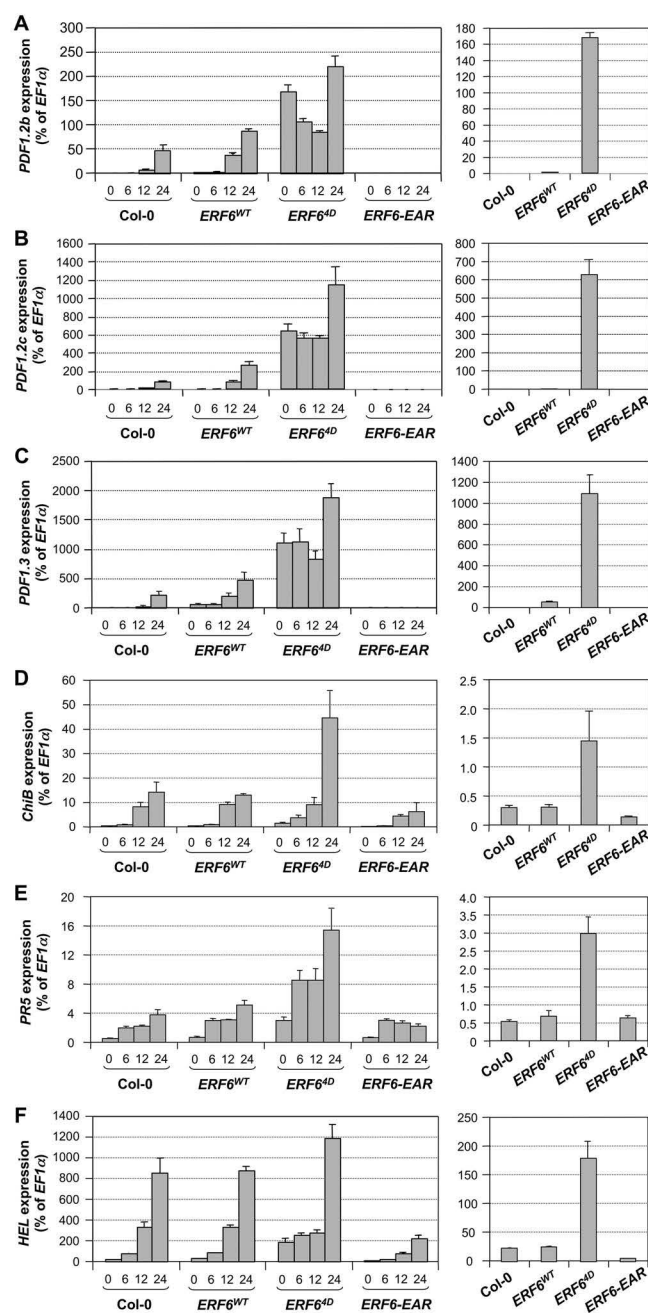

**Supplemental Figure 5.** Opposing effects of *ERF6*<sup>4D</sup> and *ERF6-EAR* transgenes on defense gene expression.

Twelve-day-old Col-0, 35S:*ERF6*<sup>WT</sup>, 35S:*ERF6*<sup>4D</sup>, and 35S:*ERF6-EAR* seedlings were inoculated with *B. cinerea* spores, and samples were collected at indicated times. Defense gene expression was quantified by real-time qPCR, and the transcript levels were calculated as a percentage of the *EF1α* transcript. Basal level expression is shown in panels on the right. Error bars indicate standard deviations (n = 3).

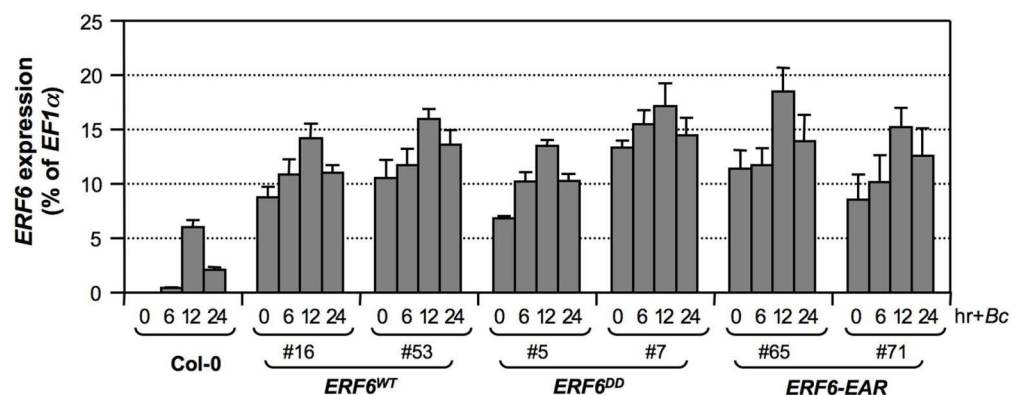

**Supplemental Figure 6.** The expression levels of endogenous *ERF6* and transgenes before and after *Botrytis* infection.

Twelve-day-old Col-0, *35S:ERF6<sup>WT</sup>*, *35S:ERF6<sup>AD</sup>*, and *35S:ERF6-EAR* seedlings (two lines each) were inoculated with *B. cinerea* spores, and samples were collected at indicated times. Defense gene expression was quantified by real-time qPCR, and the transcript levels were calculated as a percentage of the *EF1α* transcript. Primers used for qPCR detect both endogenous *ERF6* and transgene transcripts. Error bars indicate standard deviations ( $n = 3$ ).

**Supplemental Table 1.** Primers used in this study.

**Primers used for cloning of *ERF6* gene**

*ERF6-F1*: 5'-catatggctacaccaaacgaagtac-3'

*ERF6-B1*: 5'-attcaacaacgggtcaattgtgg-3'

*ERF6-B2*: 5'-attcaacaacgggtcaattgtgg-3'

**Primer pairs used for mutagenesis**

*1A-F1/B1*: 5'-ggcagccatatggctGcTccaaacgaagtacag-3' and its complementary primer

*2A-F1/B1*: 5'-ctcctcgacgaattgGctccgttgccactac-3' and its complementary primer

*3A-F1/B1*: 5'-gaaataatcgatctcgtcGctcccaaaccggag-3' and its complementary primer

*4A-F1/B1*: 5'-agcatgccgcttttaGcTccgttaGctccacaccaccg-3' and its complementary primer

*4D-F1/B1*: 5'-agcatgccgcttttaGATccgttaGAtccacaccaccg-3' and its complementary primer

Mutated nucleotides are marked with upper case letters.

**Primer pairs used for qPCR**

*EF1 $\alpha$*  (At5g60390): 5'-tgagcacgctcttctgtttca-3' and 5'-ggtgggtggcatccatctgtttaca-3'

*ERF6* (At4g17490): 5'-attgtctccgttgccacta-3' and 5'-ggtttggtttcaaattcaga-3'

*PDF1.1* (At1g75830): 5'-tggctaagtctgctaccatcggt -3' and 5'-agatccatgctgtgcttttca -3'

*PDF1.2a* (At5g44420): 5'-gttccatcatcacccttatctt-3' and 5'-tagttgcatgatccatgtttgg -3'

*PDF1.2b* (At2g26020): 5'-tgcttccatcatcacccttatctta-3' and 5'-gcaagatccatgttttgctcct-3'

*PDF1.2c* (At5g44430): 5'-tgctaccatcatcacccttctt-3' and 5'-taacatgggacgtaacagatacat-3'

*PDF1.3* (At2g26010): 5'-ctaagtctgtgccatcatcact-3' and 5'-atgttttggccccctcaaggt-3'

*ChiB* (At3g12500): 5'-cagacttccatgaaactaca-3' and 5'-ctgttcttgcttgaaacagta-3'

*HEL* (At3g04720): 5'-cggcaagtgtttaagggtgaag-3' and 5'-ttgttgatagccaaaaccatcg-3'

*PR5* (At1g75040): 5'-aggctgtgtctctgacctcaa-3' and 5'-acaagttccggcttatcggt-3'

**Primer pairs used for ChIP-qPCR**

*PDF1.2a*: 5'-ttgtcctaaccgcgagaatc-3' and 5'-cggctgggttaattctgaatgg-3'

*PDF1.2b*: 5'-ttgcatctgttccaagtcaga-3' and 5'-tgatggctgtttatctaccaca-3'

## Supplemental Methods

### Phospho-protein mobility shift assay

Phos-tag<sup>TM</sup> reagent (NARD Institute, Ltd. <http://www.phos-tag.com/english/index.html>) was used for the phospho-protein mobility shift assay to detect *in vivo* phosphorylated ERF6 protein. Proteins (10 µg) were separated in a 10% SDS-PAGE gel containing 100 µM Phos-tag<sup>TM</sup> and 200 µM MnCl<sub>2</sub>. After proteins were transferred to a nitrocellulose membrane, 4myc-tagged ERF6 was detected by using the anti-myc antibody as previously described (Mao et al., 2011).

### References

**Mao, G., Meng, X., Liu, Y., Zheng, Z., Chen, Z., and Zhang, S.** (2011). Phosphorylation of a WRKY transcription factor by two pathogen-responsive MAPKs drives phytoalexin biosynthesis in *Arabidopsis*. Plant Cell **23**, 1639-1653.
